# Supplementary material for: Linkage-length dependent structuring behaviour of bent-core molecules in helical nanostructures
Source: Royal Society of Chemistry journal article supplement (doi:10.1039/c5sm03100a), 2016-01-01
Supplement: c5sm03100a1.pdf [file c5sm03100a1.pdf]

# Supplementary Materials for

## Linkage-length dependent structuring behavior of bent-core molecules in helical nanostructures

Hanim Kim,<sup>a</sup> Anna Zep,<sup>b</sup> Seong Ho Ryu,<sup>a</sup> Hyungju Ahn,<sup>c</sup> Tae Joo Shin,<sup>d</sup> Sang Bok Lee,<sup>e</sup> Damian Porcieca,<sup>b</sup> Ewa Gorecka<sup>b\*</sup> and Dong Ki Yoon<sup>a\*</sup>

Corresponding author e-mail: [nandk@kaist.ac.kr](mailto:nandk@kaist.ac.kr), [gorecka@chem.uw.edu](mailto:gorecka@chem.uw.edu)

\* To whom correspondence should be addressed

<sup>a</sup> Graduate School of Nanoscience and Technology, KAIST, Daejeon, 305-701, Rep. of Korea

<sup>b</sup> Department of Chemistry, University of Warsaw, Warsaw, 02-089, Poland

<sup>c</sup> Pohang Accelerator Laboratory, POSTECH, Pohang, 790-784, Rep. of Korea

<sup>d</sup> UNIST Central Research Facilities, UNIST, Ulsan 689-798, Korea

<sup>e</sup> Department of Chemistry and Biochemistry, University of Maryland, College Park, MD 20742, USA

*This material contains:*

*Figures S1-S2*

*Figure S1*

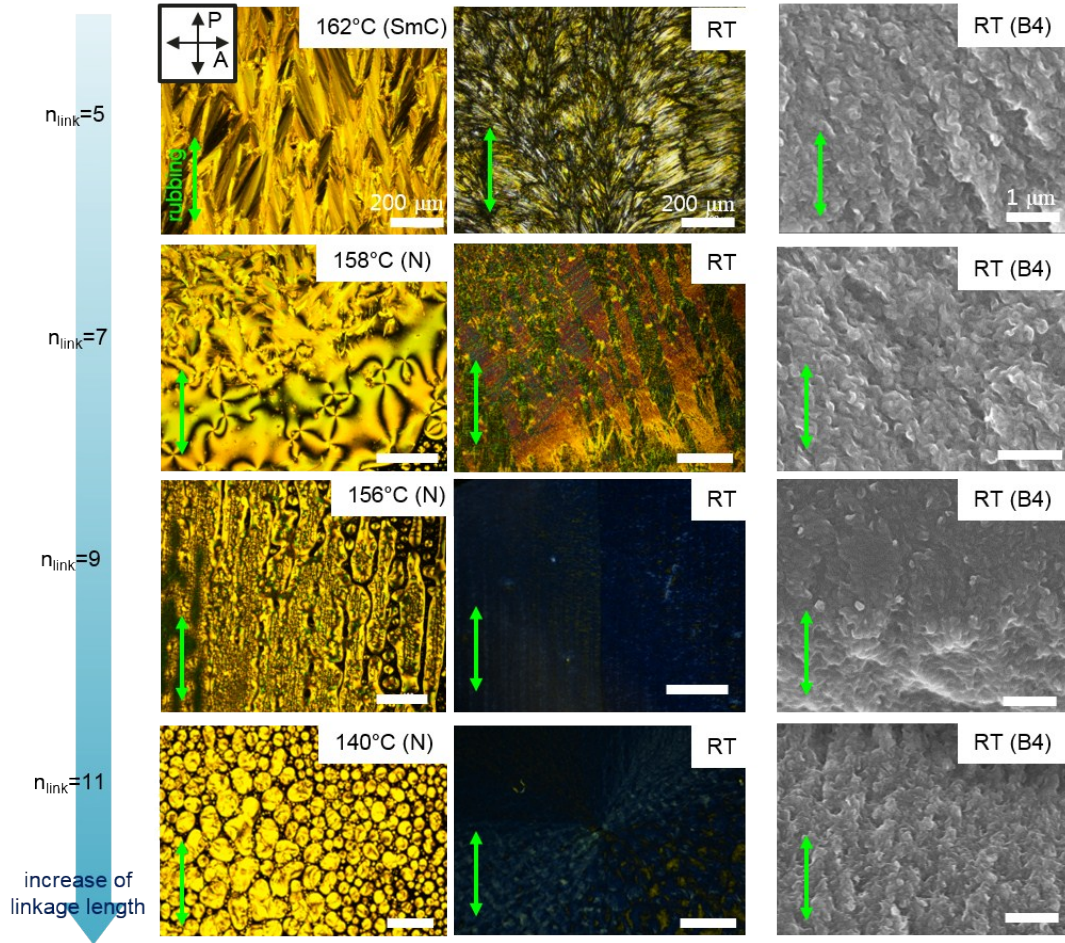

S1. Observations by DRLM and SEM on the overall thermal transitions of bulk HNFs with the homologues upon cooling (5 °C/min), which imply how the filaments are grown from preceding LC phases (Smetic C or Nematic) before reaching to B4, where each homologue alters molecular organization in layering. For the case of short spacer ( $n_{\text{link}} = 5$  and 7), it shows the pre-smectic feature at high temperature range while the long molecules ( $n_{\text{link}} = 9$  and 11) only reveal nematic phase in the whole temperature range before B4, meaning that the long-linkage group might induce geometric overlapping among the molecules which is evident in the polarized optical textures. All cases terminate their thermal transitions for B4 phase at room temperature, which show random orientation in morphology regardless of the pre-rubbed direction (green arrow). All scale bars, 200 $\mu\text{m}$ .

*Figure S2*

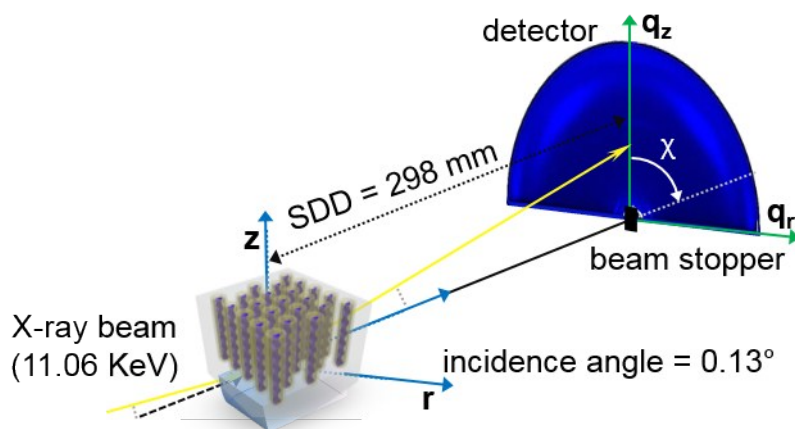

S3. Geometry of grazing incidence X-ray diffraction measurement for the simultaneous investigation of the molecular orientation and layer arrangement. X-ray beam is incidentally guided to the sample, having the beam energy of 11.06 KeV, and the size of 700  $\mu\text{m}$  (vertical) by 300  $\mu\text{m}$  (horizontal). SDD (Sample to detector distance) was 298 mm with a two-dimensional charge-coupled device (2D-CCD) detector.
